# Supplementary material for: Non-invasive detection of lymphoma with circulating tumor DNA features and protein tumor markers
Source: Front Oncol. 2024 Jan 19;14:1341997. doi: 10.3389/fonc.2024.1341997 (PMC10834776; doi:10.3389/fonc.2024.1341997)
Supplement: Supplementary file 2 [file Table_1.xlsx]

## Sheet: table S1
Table S1 Detail clinical information for each lymphoma patient and healthy individual.
SampleName	Age	Gender	Type	MajorSubtype	Cell	Progress in B-NHL	DLBCL or not	Stage
ZL0001	35	M	Lymphoma	HL	B			IV
ZL0002	41	F	Lymphoma	NHL	B	Aggressiveness	Non-DLBCL	Unknown
ZL0003	71	M	Lymphoma	NHL	B	Aggressiveness	DLBCL	III
ZL0004	63	M	Lymphoma	NHL	B	Aggressiveness	DLBCL	IV
ZL0005	52	M	Lymphoma	NHL	B	Aggressiveness	DLBCL	Unknown
ZL0006	63	F	Lymphoma	NHL	B	Aggressiveness	DLBCL	I
ZL0007	66	M	Lymphoma	NHL	B	Aggressiveness	DLBCL	Unknown
ZL0008	57	F	Lymphoma	NHL	T/NK			IV
ZL0009	39	F	Lymphoma	NHL	B	Aggressiveness	DLBCL	IV
ZL0010	54	F	Lymphoma	NHL	B	Indolence		IV
ZL0011	63	M	Lymphoma	NHL	B	Indolence		I
ZL0012	74	F	Lymphoma	HL	B			III
ZL0013	59	F	Lymphoma	NHL	B	Aggressiveness	DLBCL	III
ZL0014	62	F	Lymphoma	NHL	T/NK			IV
ZL0015	29	M	Lymphoma	NHL	B	Aggressiveness	DLBCL	Unknown
ZL0016	55	M	Lymphoma	HL	B			III
ZL0017	68	M	Lymphoma	NHL	T/NK			Unknown
ZL0018	80	F	Lymphoma	NHL	B	Aggressiveness	DLBCL	IV
ZL0019	52	F	Lymphoma	NHL	T/NK			IV
ZL0020	33	F	Lymphoma	NHL	B	Aggressiveness	DLBCL	IV
ZL0021	56	F	Lymphoma	NHL	B	Indolence		IV
ZL0022	14	F	Lymphoma	NHL	T/NK			II
ZL0023	54	F	Lymphoma	NHL	T/NK			II
ZL0024	42	M	Lymphoma	NHL	B	Aggressiveness	DLBCL	Unknown
ZL0025	53	M	Lymphoma	NHL	B	Indolence		II
ZL0026	78	M	Lymphoma	NHL	B	Aggressiveness	DLBCL	Unknown
ZL0027	27	M	Lymphoma	NHL	T/NK			IV
ZL0028	70	F	Lymphoma	NHL	B	Aggressiveness	Non-DLBCL	IV
ZL0029	49	F	Lymphoma	NHL	B	Indolence		IV
ZL0030	30	M	Lymphoma	NHL	B	Indolence		I
ZL0031	59	M	Lymphoma	NHL	T/NK			I
ZL0032	72	F	Lymphoma	NHL	B	Aggressiveness	DLBCL	I
ZL0033	60	M	Lymphoma	NHL	B	Aggressiveness	DLBCL	IV
ZL0034	53	M	Lymphoma	NHL	B	Aggressiveness	DLBCL	IV
ZL0035	49	M	Lymphoma	NHL	T/NK			IV
ZL0036	53	F	Lymphoma	NHL	T/NK			IV
ZL0037	63	F	Lymphoma	NHL	B	Indolence		IV
ZL0038	67	F	Lymphoma	NHL	B	Indolence		II
ZL0039	67	M	Lymphoma	NHL	B	Aggressiveness	DLBCL	II
ZL0040	61	M	Lymphoma	NHL	B	Aggressiveness	DLBCL	Unknown
ZL0041	61	F	Lymphoma	NHL	B	Aggressiveness	DLBCL	Unknown
ZL0042	57	M	Lymphoma	NHL	T/NK			IV
ZL0043	44	M	Lymphoma	NHL	B	Indolence		IV
ZL0044	56	F	Lymphoma	NHL	B	Indolence		II
ZL0045	17	M	Lymphoma	HL	B			II
ZL0046	55	M	Lymphoma	NHL	B	Aggressiveness	Non-DLBCL	Unknown
ZL0047	55	M	Lymphoma	NHL	T/NK			IV
ZL0048	62	M	Lymphoma	NHL	B	Aggressiveness	DLBCL	IV
ZL0049	54	F	Lymphoma	NHL	B	Aggressiveness	DLBCL	IV
ZL0050	69	F	Lymphoma	NHL	B	Aggressiveness	Non-DLBCL	IV
ZL0051	13	M	Lymphoma	HL	B			II
ZL0052	22	F	Lymphoma	NHL	B	Aggressiveness	Non-DLBCL	IV
ZL0053	44	F	Lymphoma	NHL	T/NK			Unknown
ZL0054	78	M	Lymphoma	NHL	B	Aggressiveness	DLBCL	Unknown
ZL0055	64	M	Lymphoma	NHL	T/NK			IV
ZL0056	16	M	Lymphoma	NHL	B	Aggressiveness	DLBCL	I
ZL0057	47	F	Lymphoma	NHL	B	Indolence		IV
ZL0058	69	F	Lymphoma	NHL	B	Aggressiveness	DLBCL	II
ZL0059	59	F	Lymphoma	NHL	B	Aggressiveness	DLBCL	IV
ZL0060	29	M	Lymphoma	NHL	T/NK			IV
ZL0061	38	M	Lymphoma	NHL	B	Indolence		IV
ZL0062	70	F	Lymphoma	NHL	B	Aggressiveness	DLBCL	IV
ZL0063	81	F	Lymphoma	NHL	B	Aggressiveness	DLBCL	II
ZL0064	61	F	Lymphoma	NHL	B	Aggressiveness	DLBCL	III
ZL0065	29	M	Lymphoma	NHL	B	Aggressiveness	DLBCL	I
ZL0066	56	M	Lymphoma	NHL	B	Aggressiveness	DLBCL	I
ZL0067	74	M	Lymphoma	NHL	B	Aggressiveness	DLBCL	III
ZL0068	69	M	Lymphoma	NHL	T/NK			IV
ZL0069	47	M	Lymphoma	NHL	T/NK			IV
ZL0070	42	F	Lymphoma	NHL	T/NK			I
ZL0071	64	M	Lymphoma	NHL	B	Aggressiveness	Non-DLBCL	IV
ZL0072	49	F	Lymphoma	NHL	T/NK			IV
ZL0073	15	M	Lymphoma	NHL	T/NK			IV
ZL0074	30	M	Lymphoma	HL	B			Unknown
ZL0075	34	F	Lymphoma	NHL	B	Indolence		Unknown
ZL0076	67	M	Lymphoma	NHL	B	Aggressiveness	DLBCL	II
ZL0077	37	M	Lymphoma	HL	B			II
ZL0078	31	M	Lymphoma	NHL	B	Aggressiveness	Non-DLBCL	Unknown
ZL0079	45	F	Lymphoma	NHL	T/NK			IV
ZL0080	70	F	Lymphoma	NHL	B	Aggressiveness	DLBCL	IV
ZL0081	59	M	Lymphoma	NHL	B	Aggressiveness	DLBCL	II
ZL0082	40	F	Lymphoma	NHL	B	Aggressiveness	DLBCL	II
ZL0083	71	M	Lymphoma	NHL	B	Aggressiveness	DLBCL	IV
ZL0084	41	F	Lymphoma	HL	B			III
ZL0085	66	F	Lymphoma	NHL	B	Aggressiveness	DLBCL	I
ZL0086	58	M	Lymphoma	NHL	T/NK			III
ZL0087	48	F	Lymphoma	NHL	B	Aggressiveness	DLBCL	IV
ZL0088	76	M	Lymphoma	NHL	B	Indolence		IV
ZL0089	70	F	Lymphoma	NHL	B	Aggressiveness	DLBCL	IV
ZL0090	57	M	Lymphoma	NHL	B	Aggressiveness	Non-DLBCL	IV
ZL0091	21	F	Lymphoma	HL	B			I
ZL0092	42	M	Lymphoma	NHL	B	Aggressiveness	DLBCL	IV
ZL0093	41	F	Lymphoma	NHL	B	Aggressiveness	DLBCL	I
ZL0094	69	M	Lymphoma	NHL	T/NK			Unknown
ZL0095	53	M	Lymphoma	NHL	B	Indolence		III
ZL0096	65	F	Lymphoma	NHL	T/NK			II
ZL0097	73	F	Lymphoma	NHL	B	Aggressiveness	Non-DLBCL	IV
ZL0098	48	F	Lymphoma	NHL	B	Aggressiveness	DLBCL	II
ZL0099	65	M	Lymphoma	NHL	B	Aggressiveness	DLBCL	IV
ZL0100	60	F	Lymphoma	NHL	T/NK			IV
ZL0101	28	F	Lymphoma	HL	B			IV
ZL0102	63	F	Lymphoma	NHL	B	Aggressiveness	Non-DLBCL	III
ZL0103	62	M	Lymphoma	NHL	B	Aggressiveness	DLBCL	I
ZL0104	34	F	Lymphoma	NHL	B	Aggressiveness	DLBCL	III
ZL0105	37	M	Lymphoma	NHL	B	Indolence		IV
ZL0106	59	F	Lymphoma	NHL	B	Aggressiveness	DLBCL	IV
ZL0107	58	M	Lymphoma	NHL	B	Aggressiveness	Non-DLBCL	IV
ZL0108	68	M	Lymphoma	NHL	B	Aggressiveness	DLBCL	I
ZL0109	22	F	Lymphoma	HL	B			III
ZL0110	64	M	Lymphoma	NHL	B	Aggressiveness	Non-DLBCL	III
ZL0111	69	F	Lymphoma	NHL	T/NK			II
ZL0112	61	F	Lymphoma	NHL	B	Aggressiveness	DLBCL	I
ZL0113	40	F	Lymphoma	NHL	B	Aggressiveness	DLBCL	Unknown
ZL0114	58	M	Lymphoma	NHL	B	Aggressiveness	DLBCL	IV
ZL0115	35	M	Lymphoma	NHL	T/NK			I
ZL0116	38	M	Lymphoma	NHL	B	Aggressiveness	DLBCL	I
ZL0117	45	M	Lymphoma	NHL	B	Aggressiveness	Non-DLBCL	II
ZL0118	51	M	Lymphoma	NHL	B	Indolence		Unknown
ZL0119	26	M	Lymphoma	HL	B			IV
ZL0120	52	M	Lymphoma	NHL	B	Aggressiveness	DLBCL	I
ZL0121	51	M	Lymphoma	NHL	B	Indolence		IV
ZL0122	51	F	Lymphoma	NHL	B	Aggressiveness	DLBCL	IV
ZL0123	35	M	Lymphoma	NHL	T/NK			III
ZL0124	49	M	Lymphoma	NHL	B	Aggressiveness	DLBCL	II
ZL0125	31	M	Lymphoma	NHL	B	Aggressiveness	DLBCL	IV
ZL0126	40	M	Lymphoma	NHL	B	Aggressiveness	DLBCL	Unknown
ZL0127	41	F	Lymphoma	NHL	B	Aggressiveness	DLBCL	IV
ZL0128	23	M	Lymphoma	NHL	T/NK			IV
ZL0129	52	F	Lymphoma	NHL	B	Aggressiveness	DLBCL	IV
ZL0130	38	F	Lymphoma	NHL	B	Indolence		IV
ZL0131	52	M	Lymphoma	HL	B			IV
ZL0132	41	M	Lymphoma	NHL	B	Aggressiveness	DLBCL	Unknown
ZL0133	53	M	Lymphoma	NHL	B	Aggressiveness	DLBCL	IV
ZL0134	57	M	Lymphoma	NHL	T/NK			I
ZL0135	68	M	Lymphoma	NHL	B	Aggressiveness	DLBCL	IV
ZL0136	37	F	Lymphoma	NHL	B	Aggressiveness	DLBCL	III
ZL0137	63	F	Lymphoma	NHL	B	Aggressiveness	DLBCL	Unknown
ZL0138	26	M	Lymphoma	NHL	B	Aggressiveness	Non-DLBCL	IV
ZL0139	36	M	Lymphoma	NHL	B	Indolence		II
ZL0140	73	F	Lymphoma	NHL	B	Aggressiveness	DLBCL	IV
ZL0141	40	F	Lymphoma	NHL	B	Aggressiveness	DLBCL	Unknown
ZL0142	7	F	Lymphoma	HL	B			Unknown
ZL0143	64	F	Lymphoma	NHL	T/NK			Unknown
ZL0144	73	F	Lymphoma	NHL	B	Aggressiveness	DLBCL	Unknown
HZ0001	29	F	Healthy
HZ0002	53	M	Healthy
HZ0003	42	F	Healthy
HZ0004	32	F	Healthy
HZ0005	34	F	Healthy
HZ0006	32	F	Healthy
HZ0007	30	M	Healthy
HZ0008	40	M	Healthy
HZ0009	26	F	Healthy
HZ0010	32	M	Healthy
HZ0011	67	F	Healthy
HZ0012	64	M	Healthy
HZ0013	50	M	Healthy
HZ0014	67	F	Healthy
HZ0015	40	M	Healthy
HZ0016	30	F	Healthy
HZ0017	57	M	Healthy
HZ0018	40	M	Healthy
HZ0019	46	M	Healthy
HZ0020	50	M	Healthy
HZ0021	38	F	Healthy
HZ0022	35	F	Healthy
HZ0023	45	M	Healthy
HZ0024	49	M	Healthy
HZ0025	44	F	Healthy
HZ0026	71	M	Healthy
HZ0027	75	F	Healthy
HZ0028	38	M	Healthy
HZ0029	21	F	Healthy
HZ0030	55	M	Healthy
HZ0031	44	M	Healthy
HZ0032	46	F	Healthy
HZ0033	47	M	Healthy
HZ0034	51	M	Healthy
HZ0035	33	F	Healthy
HZ0036	53	F	Healthy
HZ0037	52	F	Healthy
HZ0038	39	F	Healthy
HZ0039	23	F	Healthy
HZ0040	58	M	Healthy
HZ0041	38	F	Healthy
HZ0042	55	M	Healthy
HZ0043	68	M	Healthy
HZ0044	26	F	Healthy
HZ0045	47	M	Healthy
HZ0046	42	M	Healthy
HZ0047	40	F	Healthy
HZ0048	51	F	Healthy
HZ0049	54	F	Healthy
HZ0050	50	M	Healthy
HZ0051	52	F	Healthy
HZ0052	43	F	Healthy
HZ0053	48	M	Healthy
HZ0054	49	M	Healthy
HZ0055	31	M	Healthy
HZ0056	47	F	Healthy
HZ0057	51	M	Healthy
HZ0058	52	F	Healthy
HZ0059	56	F	Healthy
HZ0060	39	F	Healthy
HZ0061	61	M	Healthy
HZ0062	61	F	Healthy
HZ0063	42	M	Healthy
HZ0064	56	F	Healthy
HZ0065	41	F	Healthy
HZ0066	29	F	Healthy
HZ0067	41	M	Healthy
HZ0068	40	M	Healthy
HZ0069	47	M	Healthy
HZ0070	64	M	Healthy
HZ0071	34	M	Healthy
HZ0072	42	M	Healthy
HZ0073	22	F	Healthy
HZ0074	52	F	Healthy
HZ0075	45	M	Healthy
HZ0076	46	F	Healthy
HZ0077	48	F	Healthy
HZ0078	73	M	Healthy
HZ0079	40	M	Healthy
HZ0080	75	F	Healthy
HZ0081	66	F	Healthy
HZ0082	40	M	Healthy
HZ0083	65	M	Healthy
HZ0084	28	M	Healthy
HZ0085	61	F	Healthy
HZ0086	61	M	Healthy
HZ0087	48	M	Healthy
HZ0088	47	F	Healthy
HZ0089	78	M	Healthy
HZ0090	37	F	Healthy
HZ0091	36	F	Healthy
HZ0092	22	F	Healthy
HZ0093	49	M	Healthy
HZ0094	40	F	Healthy
HZ0095	36	M	Healthy
HZ0096	33	F	Healthy
HZ0097	50	M	Healthy
HZ0098	36	F	Healthy
HZ0099	62	M	Healthy
HZ0100	69	F	Healthy
HZ0101	38	M	Healthy
HZ0102	32	F	Healthy
HZ0103	37	F	Healthy
HZ0104	39	M	Healthy
HZ0105	24	M	Healthy
HZ0106	25	M	Healthy
HZ0107	29	F	Healthy
HZ0108	26	M	Healthy
HZ0109	44	F	Healthy
HZ0110	53	M	Healthy
HZ0111	47	M	Healthy
HZ0112	52	M	Healthy
HZ0113	59	F	Healthy
HZ0114	27	M	Healthy
HZ0115	58	M	Healthy
HZ0116	52	F	Healthy
HZ0117	60	F	Healthy
HZ0118	37	F	Healthy
HZ0119	50	M	Healthy
HZ0120	51	F	Healthy
HZ0121	70	F	Healthy
HZ0122	74	M	Healthy
HZ0123	58	F	Healthy
HZ0124	48	F	Healthy
HZ0125	24	M	Healthy
HZ0126	53	F	Healthy
HZ0127	29	F	Healthy
HZ0128	15	M	Healthy
HZ0129	55	F	Healthy
HZ0130	54	F	Healthy
HZ0131	65	M	Healthy
HZ0132	29	M	Healthy
HZ0133	50	M	Healthy
HZ0134	54	M	Healthy
HZ0135	54	M	Healthy
HZ0136	75	F	Healthy
HZ0137	22	F	Healthy
HZ0138	54	M	Healthy
HZ0139	49	M	Healthy
HZ0140	52	F	Healthy
HZ0141	35	F	Healthy
HZ0142	51	F	Healthy
HZ0143	75	M	Healthy
HZ0144	57	F	Healthy
HZ0145	57	F	Healthy
HZ0146	57	F	Healthy
HZ0147	49	F	Healthy
HZ0148	66	M	Healthy
HZ0149	67	F	Healthy
HZ0150	56	F	Healthy
HZ0151	67	M	Healthy
HZ0152	58	F	Healthy
HZ0153	57	M	Healthy
HZ0154	53	F	Healthy
HZ0155	53	M	Healthy
HZ0156	48	F	Healthy
HZ0157	52	F	Healthy
HZ0158	49	F	Healthy
HZ0159	65	F	Healthy
HZ0160	53	M	Healthy
HZ0161	33	M	Healthy
HZ0162	55	F	Healthy
HZ0163	55	F	Healthy
HZ0164	66	M	Healthy
HZ0165	48	F	Healthy
HZ0166	55	F	Healthy
HZ0167	50	M	Healthy
HZ0168	54	M	Healthy
HZ0169	58	M	Healthy
HZ0170	52	M	Healthy
HZ0171	53	M	Healthy
HZ0172	60	F	Healthy
HZ0173	47	M	Healthy
HZ0174	51	F	Healthy
HZ0175	61	M	Healthy
HZ0176	40	F	Healthy
HZ0177	55	F	Healthy
HZ0178	54	F	Healthy
HZ0179	31	F	Healthy
HZ0180	59	M	Healthy
HZ0181	47	M	Healthy
HZ0182	29	M	Healthy
HZ0183	50	F	Healthy
HZ0184	24	F	Healthy
HZ0185	22	F	Healthy
HZ0186	58	F	Healthy
HZ0187	43	F	Healthy
HZ0188	58	M	Healthy
HZ0189	53	M	Healthy
HZ0190	55	M	Healthy
HZ0191	53	F	Healthy
HZ0192	67	F	Healthy
HZ0193	40	F	Healthy
HZ0194	35	F	Healthy
HZ0195	68	M	Healthy
HZ0196	61	F	Healthy
HZ0197	62	M	Healthy
HZ0198	64	M	Healthy
HZ0199	58	F	Healthy
HZ0200	56	F	Healthy
HZ0201	65	F	Healthy
HZ0202	46	F	Healthy
HZ0203	50	F	Healthy
HZ0204	50	F	Healthy
HZ0205	47	F	Healthy
HZ0206	65	F	Healthy
HZ0207	44	M	Healthy
HZ0208	47	M	Healthy
HZ0209	46	M	Healthy
HZ0210	46	M	Healthy
HZ0211	49	F	Healthy
HZ0212	49	F	Healthy
HZ0213	50	F	Healthy
HZ0214	48	F	Healthy
HZ0215	51	M	Healthy
HZ0216	65	M	Healthy
HZ0217	39	M	Healthy
HZ0218	32	M	Healthy
HZ0219	67	M	Healthy
HZ0220	50	M	Healthy
HZ0221	49	F	Healthy
HZ0222	53	F	Healthy
HZ0223	51	M	Healthy
HZ0224	56	M	Healthy
HZ0225	51	F	Healthy
HZ0226	27	M	Healthy
HZ0227	24	M	Healthy
HZ0228	36	F	Healthy
HZ0229	44	M	Healthy
HZ0230	58	F	Healthy
HZ0231	37	F	Healthy
HZ0232	29	F	Healthy
HZ0233	38	M	Healthy
HZ0234	38	M	Healthy
HZ0235	69	F	Healthy
HZ0236	58	F	Healthy
HZ0237	43	M	Healthy
HZ0238	26	F	Healthy
HZ0239	48	M	Healthy
HZ0240	51	F	Healthy
HZ0241	59	M	Healthy
HZ0242	67	F	Healthy
HZ0243	52	F	Healthy
HZ0244	51	M	Healthy
HZ0245	58	M	Healthy
HZ0246	67	M	Healthy
HZ0247	66	F	Healthy
HZ0248	37	F	Healthy
HZ0249	59	M	Healthy
HZ0250	50	F	Healthy
HZ0251	63	M	Healthy
HZ0252	59	M	Healthy
HZ0253	46	F	Healthy
HZ0254	53	M	Healthy
HZ0255	56	F	Healthy
HZ0256	56	F	Healthy
HZ0257	56	F	Healthy
HZ0258	54	M	Healthy
HZ0259	54	M	Healthy
HZ0260	54	F	Healthy
HZ0261	56	M	Healthy
HZ0262	50	M	Healthy
HZ0263	41	M	Healthy
HZ0264	43	F	Healthy
HZ0265	46	M	Healthy
HZ0266	52	F	Healthy
HZ0267	56	M	Healthy
HZ0268	52	F	Healthy
HZ0269	55	M	Healthy
HZ0270	39	F	Healthy
HZ0271	66	M	Healthy
HZ0272	68	F	Healthy
HZ0273	43	F	Healthy
HZ0274	58	F	Healthy
HZ0275	58	M	Healthy
HZ0276	48	M	Healthy
HZ0277	73	M	Healthy
HZ0278	34	M	Healthy
HZ0279	28	F	Healthy
HZ0280	25	F	Healthy
HZ0281	25	F	Healthy
HZ0282	56	M	Healthy
HZ0283	56	M	Healthy
HZ0284	57	F	Healthy
HZ0285	58	F	Healthy
HZ0286	54	M	Healthy
HZ0287	45	F	Healthy
HZ0288	49	F	Healthy
HZ0289	49	M	Healthy
HZ0290	38	M	Healthy
HZ0291	27	F	Healthy
HZ0292	57	F	Healthy
HZ0293	62	F	Healthy
HZ0294	51	F	Healthy
HZ0295	68	M	Healthy
HZ0296	65	F	Healthy
HZ0297	58	M	Healthy
HZ0298	53	M	Healthy
HZ0299	37	M	Healthy
HZ0300	36	F	Healthy
HZ0301	33	M	Healthy
HZ0302	56	M	Healthy
HZ0303	34	F	Healthy
HZ0304	32	F	Healthy
HZ0305	58	F	Healthy
HZ0306	29	F	Healthy
HZ0307	35	F	Healthy
HZ0308	25	F	Healthy
HZ0309	27	M	Healthy
HZ0310	57	M	Healthy
HZ0311	59	F	Healthy
HZ0312	49	F	Healthy
HZ0313	51	M	Healthy
HZ0314	50	F	Healthy
HZ0315	54	F	Healthy
HZ0316	54	F	Healthy
HZ0317	55	F	Healthy
HZ0318	83	F	Healthy
HZ0319	36	F	Healthy
HZ0320	56	M	Healthy
HZ0321	34	F	Healthy
HZ0322	33	M	Healthy
HZ0323	32	F	Healthy
HZ0324	29	F	Healthy
HZ0325	27	M	Healthy
HZ0326	25	F	Healthy
HZ0327	27	F	Healthy
HZ0328	33	F	Healthy
HZ0329	30	F	Healthy
HZ0330	27	F	Healthy
HZ0331	33	F	Healthy
HZ0332	23	F	Healthy
HZ0333	30	F	Healthy
HZ0334	23	F	Healthy
HZ0335	29	F	Healthy
HZ0336	33	M	Healthy
HZ0337	26	F	Healthy
HZ0338	53	M	Healthy
HZ0339	30	M	Healthy
HZ0340	40	M	Healthy
HZ0341	32	F	Healthy
HZ0342	42	F	Healthy
HZ0343	32	F	Healthy
HZ0344	55	M	Healthy
HZ0345	42	M	Healthy
HZ0346	34	M	Healthy
HZ0347	31	F	Healthy
HZ0348	56	M	Healthy
HZ0349	33	M	Healthy
HZ0350	62	M	Healthy
HZ0351	59	F	Healthy
HZ0352	58	F	Healthy
HZ0353	58	M	Healthy
HZ0354	55	M	Healthy
HZ0355	53	F	Healthy
HZ0356	51	F	Healthy
HZ0357	83	M	Healthy
HZ0358	33	M	Healthy
HZ0359	26	F	Healthy
HZ0360	53	M	Healthy
HZ0361	30	M	Healthy
HZ0362	32	F	Healthy
HZ0363	42	F	Healthy
HZ0364	32	F	Healthy
HZ0365	42	M	Healthy
HZ0366	60	F	Healthy
HZ0367	32	M	Healthy
HZ0368	31	F	Healthy
HZ0369	34	F	Healthy
HZ0370	33	F	Healthy
HZ0371	32	F	Healthy
HZ0372	31	M	Healthy
HZ0373	25	F	Healthy
HZ0374	48	M	Healthy
HZ0375	22	F	Healthy
HZ0376	29	M	Healthy
HZ0377	44	M	Healthy
HZ0378	44	F	Healthy
HZ0379	68	M	Healthy
HZ0380	33	F	Healthy
HZ0381	30	F	Healthy
HZ0382	41	M	Healthy
HZ0383	44	F	Healthy
HZ0384	46	F	Healthy
HZ0385	29	M	Healthy
HZ0386	43	M	Healthy
HZ0387	35	M	Healthy
HZ0388	32	M	Healthy
HZ0389	45	F	Healthy
HZ0390	47	F	Healthy
HZ0391	48	F	Healthy
HZ0392	55	F	Healthy
HZ0393	50	F	Healthy
HZ0394	40	M	Healthy
HZ0395	36	F	Healthy
HZ0396	65	M	Healthy

## Sheet: table S2
Table S2 The difference of CA125 expression between lymphoma patients and healthy individuals.
		CA125 expression*
	Type	Positive	Negative	P-value
Female	Lymphoma	21	46	<0.001
	Healthy	7	207
Male	Lymphoma	19	58	<0.001
	Healthy	2	180
*CA125 cut-off value: 35 U/ml

## Sheet: table S3
Table S3 Significantly recurrent amplification or deletion broad regions.
Arm	# Genes	Amp frequency	Amp frequency score	Amp z-score	Amp q-value	Del frequency	Del frequency score	Del z-score	Del q-value
1p	3092	0.03	0.03	-1.2	0.989	0.07	0.07	0.969	0.855
1q	2863	0.1	0.1	2.53	0.0259	0.03	0.04	-0.731	0.989
2p	1500	0.05	0.05	-0.0628	0.859	0.03	0.03	-1.17	0.989
2q	2495	0.03	0.04	-0.884	0.989	0.03	0.03	-1.25	0.989
3p	1531	0.14	0.14	4.81	9.07e-06	0.01	0.01	-2.18	0.989
3q	1708	0.15	0.15	5.21	3.49e-06	0.01	0.02	-1.77	0.989
4p	693	0.03	0.04	-0.683	0.989	0.07	0.07	1.17	0.855
4q	1467	0.02	0.02	-1.48	0.989	0.08	0.09	1.83	0.855
5p	456	0.14	0.14	5.05	3.99e-06	0.03	0.03	-0.903	0.989
5q	2185	0.11	0.11	3.32	0.0027	0.03	0.03	-1.06	0.989
6p	1664	0.06	0.06	0.693	0.489	0.03	0.03	-1.14	0.989
6q	1304	0.03	0.04	-0.734	0.989	0.06	0.06	0.741	0.951
7p	926	0.1	0.1	2.62	0.0227	0.01	0.02	-1.83	0.989
7q	1717	0.08	0.09	1.84	0.0917	0.03	0.03	-1.1	0.989
8p	795	0.02	0.02	-1.48	0.989	0.07	0.07	1.12	0.855
8q	1249	0.01	0.01	-1.89	0.989	0.07	0.07	1.06	0.855
9p	621	0.09	0.09	2.26	0.0428	0.01	0.02	-1.83	0.989
9q	1610	0.06	0.06	0.313	0.689	0.03	0.03	-1.16	0.989
10p	767	0.01	0.01	-1.94	0.989	0.03	0.04	-0.822	0.989
10q	1968	0.01	0.01	-2	0.989	0.03	0.03	-1.27	0.989
11p	1162	0.07	0.07	1.14	0.328	0.03	0.04	-0.709	0.989
11q	2133	0.07	0.07	1.04	0.358	0.03	0.03	-1.15	0.989
12p	804	0.12	0.13	4.23	0.000103	0.03	0.03	-0.955	0.989
12q	2055	0.12	0.12	3.71	0.000733	0.03	0.03	-1.03	0.989
13q	1092	0.04	0.04	-0.349	0.989	0.06	0.06	0.39	0.989
14q	1829	0.06	0.06	0.299	0.689	0.03	0.03	-1.17	0.989
15q	2082	0.03	0.04	-0.862	0.989	0.03	0.03	-1.23	0.989
16p	1378	0.03	0.03	-1.15	0.989	0.06	0.06	0.329	0.989
16q	1070	0.02	0.02	-1.51	0.989	0.06	0.06	0.713	0.951
17q	2298	0.05	0.05	0.00606	0.853	0.07	0.07	1.1	0.855
18q	644	0.09	0.09	2.26	0.0428	0.01	0.02	-1.83	0.989
19q	2402	0.09	0.09	2.08	0.0618	0.01	0.01	-2.29	0.989
20p	583	0.06	0.06	0.749	0.489	0.02	0.02	-1.48	0.989
20q	1092	0.06	0.06	0.712	0.489	0.02	0.02	-1.51	0.989
21q	750	0.08	0.09	1.92	0.0825	0.03	0.03	-1.05	0.989
22q	1258	0.01	0.01	-2.28	0.989	0.08	0.08	1.42	0.855

## Sheet: table S4
Table S4 EBV detection in tissue and blood
		EBER in situ hybridization for EBV detection in tissue
Method	EBV status	EBV-	EBV+	Sensitivity
sWGS in blood	EBV-	5	1	0.938
	EBV+	0	15
Real-time PCR in blood	EBV-	5	11	0.313
	EBV+	0	5
EBER: Epstein-Barr encoding region

## Sheet: table S5
Table S5 Performance of SeekInCare assay in detecting lymphoma patients.
Test characteristic	Lymphoma	Healthy
Predicted cancer	112	8
Predicted non-cancer	32	388
Sensitivity, % (95% CI)*	77.8 (70.1-84.3)
Specificity, % (95% CI)	98.0 (96.1-99.1)
Accuracy, % (95% CI)	92.6 (90.0-94.7)
Positive predictive value, % (95% CI)	93.3 (87.3-97.1)
Negative predictive value, % (95% CI)	92.4 (89.4-94.7)
*Brackets indicate 95% confidence interval.
